# Supplementary material
Source: PubMed Central journal article supplement (PMC4425427)
Supplement: NIHMS620742-supplement-Supp_FigureS1-S2___TableS1-S3.pdf [file NIHMS620742-supplement-Supp_FigureS1-S2___TableS1-S3.pdf]

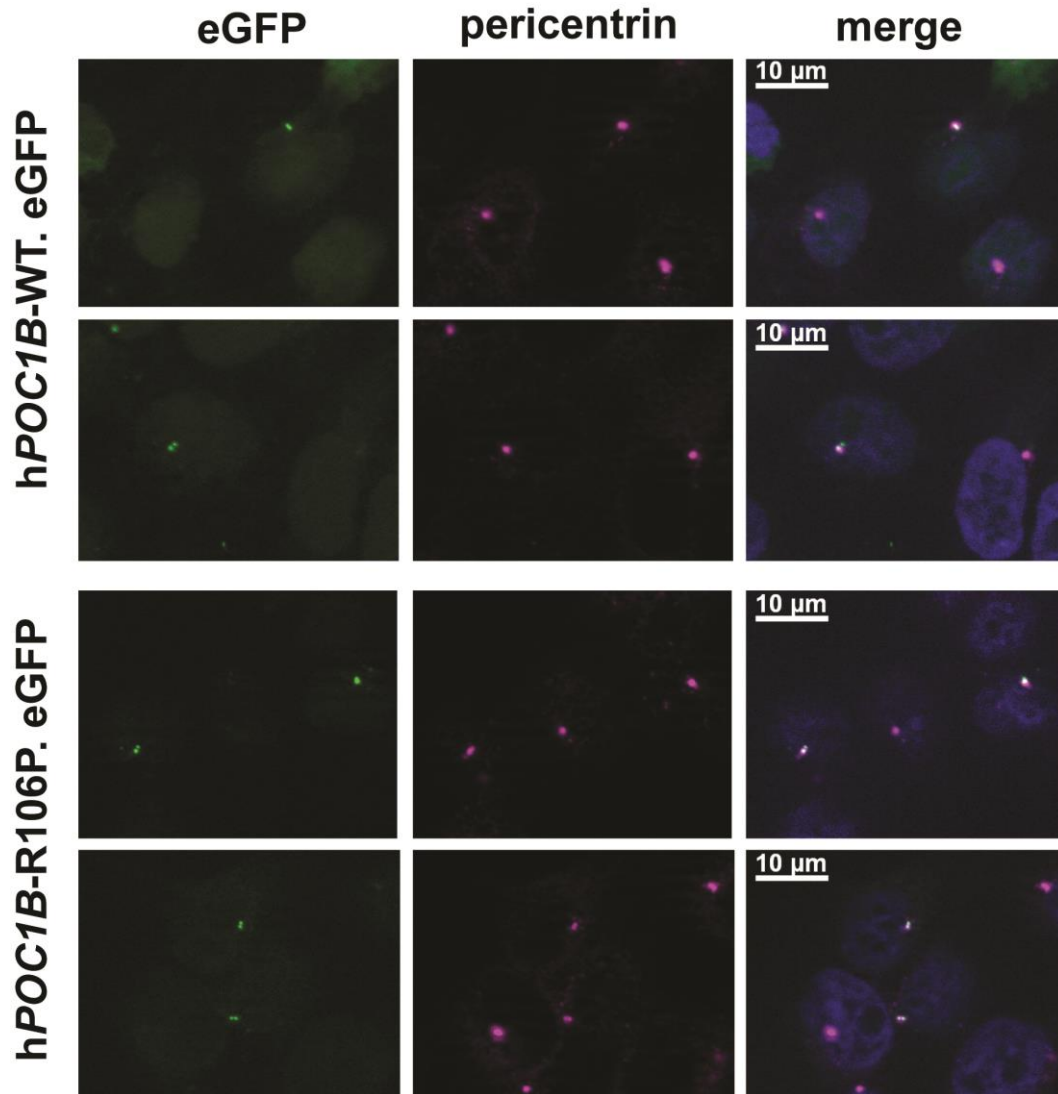

**SUPP. FIGURE S1.** Centrosomal localization of wild-type and mutant POC1B. HEK293T cells were transfected either with the hPOC1B-WT.eGFP plasmid (containing wild-type *POC1B*) or with the hPOC1B-R106P.eGFP (containing the mutation of the patient described herein, p.Arg106Pro). Immunofluorescence analysis reveals that mutant and wild-type POC1B both localize at the centrosome. The left panels show the localization of both hPOC1B.eGFP fusion proteins (green). The middle panels show the localization of pericentrin, a centrosomal marker protein (magenta). The right panels show the merged images, DAPI was used to detect cell nuclei (blue). Scale bars = 10 μm.

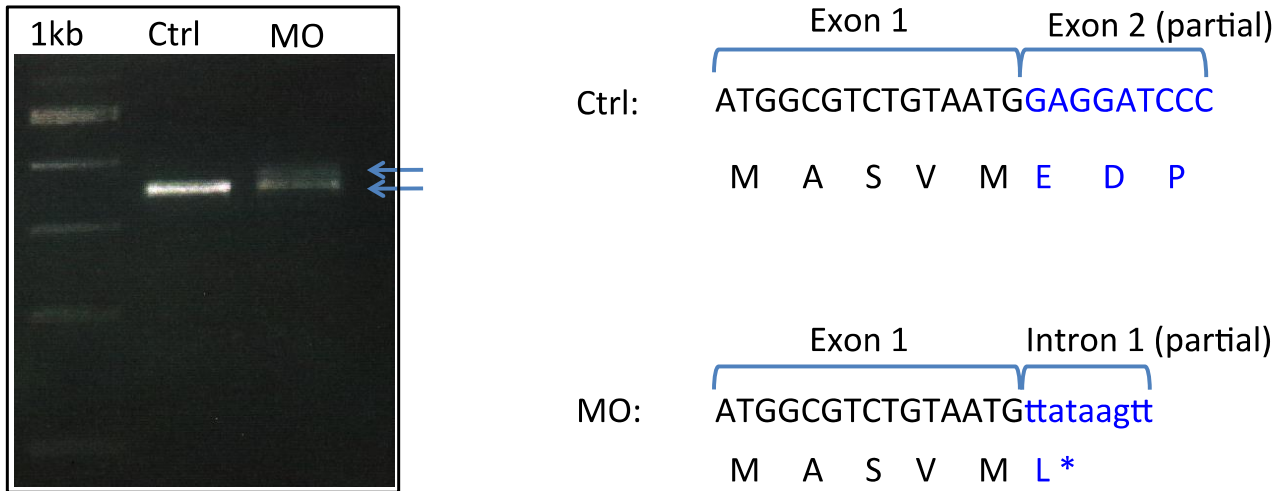

**SUPP. FIGURE S2.** RT-PCR of cDNA from embryos injected with the *poc1b* splice blocking morpholino targeting the exon1/intron 1 boundary. 1 kb DNA ladder is in the left lane. In the control (center) lane, the normal transcript fragment size is approximately 360 bp. In the MO lane (right), the normal transcript is less abundant, and a slightly larger band is also observed (blue arrows). The larger band in the MO lane shown in A arises from a cryptic splice site in the first intron. Translation showing the early truncation resulting from this mis-splicing is shown to the right of the gel image.

**SUPP. TABLE S1. Genes with two or more heterozygous rare variants from WES data of the index patient**

| Gene                      | Chr | Position (GRCh37)   | RefSeq         | Nucleotide alteration | Protein alteration | Variant name | Variant frequency | Sift | Polyphen | GERP | MutTast | Mendelian disease                    | ciliary/centrosomal   |
|---------------------------|-----|---------------------|----------------|-----------------------|--------------------|--------------|-------------------|------|----------|------|---------|--------------------------------------|-----------------------|
| <i>HECTD3</i>             | 1   | 45,475,886          | NM_024602.5    | c.610G>A              | p.Val204Ile        | rs41269097   | 0,0033            | 0.2  | 1        | 2.2  | pat     | unknown                              | no                    |
|                           |     | 45,476,368          |                | c.380C>G              | p.Ala127Gly        | -            | 0,0028            | 0.1  | 1        | 1.1  | pol     |                                      |                       |
| <i>FAAH</i>               | 1   | 46,874,246          | NM_001441.2    | c.1067C>T             | p.Ala356Val        | rs77101686   | 0,0016            | na   | 3        | 5.4  | pat     | unknown                              | yes                   |
|                           |     | 46,877,885          |                | c.1427C>G             | p.Ala476Gly        | rs75429705   | 0,0015            | 0.76 | 1        | 4.7  | pol     |                                      |                       |
| <i>LAMC1</i>              | 1   | 183,079,729         | NM_002293.3    | c.961C>T              | p.Pro321Ser        | rs142614579  | 0,0005            | na   | 3        | 4.9  | pat     | Dandy-Walker + occip. cephaloc. (ad) | no                    |
|                           |     | 183,091,040         |                | c.2173G>A             | p.Ala725Thr        | rs147401305  | 0,0005            | 0.79 | 1        | 1.5  | pol     |                                      |                       |
| <i>DNAH14</i>             | 1   | 225,268,346         | NM_001373.1    | c.3032G>T             | p.Arg1011Leu       | -            | -                 | na   | na       | 6.7  | pol     | unknown                              | likely (motile cilia) |
|                           |     | 225,586,937         |                | c.13514G>A            | p.Arg4505Gln       | rs45606432   | 0,0016            | 0.08 | na       | 1.6  | pol     |                                      |                       |
| <i>APOB</i>               | 2   | 21,225,500          | NM_000384.2    | c.12794T>C            | p.Val4265Ala       | rs61743502   | 0,006             | 0,08 | 1        | 1.1  | pol     | hypobetalipo-protein. (ad)           | no                    |
|                           |     | 21,232,019          |                | c.7721C>T             | p.Ala2574Val       | rs150843941  | 0,0003            | 0.02 | 2        | 5.2  | pat     |                                      |                       |
| <i>OTOF</i>               | 2   | 26,698,882          | NM_194248.2    | c.2891C>T             | p.Ala964Glu        | -            | 0,0001            | 0.52 | 1        | 5.4  | pat     | deafness (ar)                        | no                    |
|                           |     | 26,700,288          |                | c.2401_2402delinsTT   | p.Glu801Leu        | rs111033392  | -                 | na   | na       | na   | pat     |                                      |                       |
| <i>EVC2</i>               | 4   | 5,633,668-5,633,676 | NM_147127.4    | c.1560_1562del        | p.Glu520del        | -            | -                 | na   | na       | na   | pol     | Ellis-van Crefeld syndrome           | yes                   |
|                           |     | 5,667,334           |                | c.913G>T              | p.Ala305Ser        | rs150367317  | 0,0005            | na   | 3        | 5.3  | pol     |                                      |                       |
|                           |     | 5,667,343           |                | c.904T>A              | p.Phe302Ile        | rs138728350  | 0,0005            | na   | 3        | 4.1  | pol     |                                      |                       |
| <i>DNAH11</i>             | 7   | 21,828,959          | NM_003777.3    | c.10046T>C            | p.Val3349Ala       | -            | -                 | 1    | 1        | -7.6 | pol     | Kartagener syndrome (ar)             | yes (motile cilia)    |
|                           |     | 21,847,518          |                | c.10204C>G            | p.Gln3402Glu       | -            | -                 | 1    | 3        | 5.1  | pol     |                                      |                       |
|                           |     | 21,940,816          |                | c.13516G>A            | p.Glu4506Lys       | rs143362381  | 0,0022            | 1    | 1        | 0.5  | pol     |                                      |                       |
| <i>C9orf174 (CCDC180)</i> | 9   | 100,092,918         | NM_020893.2    | c.2275G>C             | p.Gly759Arg        | rs79340881   | 0,0057            | na   | na       | -0.7 | pol     | unknown                              | no                    |
|                           |     | 100,133,973         |                | c.4717G>A             | p.Asp1573Asn       | rs2306093    | 0,0057            | na   | na       | 5.3  | pol     |                                      |                       |
| <i>ATN1</i>               | 12  | 7,047,854           | NM_001940.3    | c.2728G>C             | p.Ala910Pro        | -            | -                 | na   | na       | 3.8  | pat     | DRPLA (ad)                           | no                    |
|                           |     | 7,047,949           |                | c.2823C>G             | p.Asp941Glu        | rs146691350  | 0,0023            | na   | na       | 0.4  | pol     |                                      |                       |
| <i>SENP1</i>              | 12  | 48,482,726          | NM_001267594.1 | c.238A>G              | p.Ser80Gly         | rs112688170  | 0,004             | 0.02 | 2        | 5.3  | pol     | unknown                              | no                    |
|                           |     | 48,458,902          |                | c.1221A>C             | p.Gln407His        | -            | -                 | 0.15 | 1        | -2.2 | pol     |                                      |                       |
| <i>TENC1</i>              | 12  | 53,445,723          | NM_015319.2    | c.190G>A              | p.Asp64Asn         | -            | -                 | na   | na       | 5.4  | pat     | unknown                              | no                    |
|                           |     | 53,453,014          |                | c.1619G>A             | p.Arg540Gln        | rs186505042  | 0,004             | na   | na       | 4.6  | pol     |                                      |                       |
| <i>NCOR2</i>              | 12  | 124,815,439         | NM_006312.5    | c.6910A>G             | p.Ser2304Gly       | rs2228587    | 0,0067            | na   | na       | 4.7  | pol     | unknown                              | no                    |

| Gene   | Chr | Position (GRCh37) | RefSeq         | Nucleotide alteration | Protein alteration | Variant name | Variant frequency | Sift | Polyphen | GERP | MutTast | Mendelian disease | ciliary/centrosomal |
|--------|-----|-------------------|----------------|-----------------------|--------------------|--------------|-------------------|------|----------|------|---------|-------------------|---------------------|
|        |     | 124,957,669       |                | c.420C>A              | p.Ser140Arg        | -            | -                 | na   | na       | 4.6  | pat     |                   |                     |
| MYO5C  | 15  | 52,505,390        | NM_018728.3    | c.4136T>C             | p.Ile1379Thr       | -            | -                 | 0.01 | 3        | 5.4  | pat     | unknown           | no                  |
|        |     | 52,539,165        |                | c.1928C>T             | p.Thr643Met        | rs56250328   | 0,0008            | 0.05 | 3        | 4.4  | pat     |                   |                     |
| NGRN   | 15  | 90,814,578        | NM_001033088.1 | c.434G>A              | p.Gly145Glu        | rs116320466  | 0,0009            | 0.18 | na       | 2.7  | pol     | unknown           | no                  |
|        |     | 90,814,944        |                | c.800A>G              | p.Asp267Gly        | rs16944113   | 0,0095            | 0.76 | na       | -2.5 | pol     |                   |                     |
| MSLN   | 16  | 815,549           | NM_013404.4    | c.727T>C              | p.Ser243Pro        | rs75279195   | 0,0058            | 0.13 | 3        | 1.9  | pol     | unknown           | no                  |
|        |     | 815,565           |                | c.743T>C              | p.Leu248Pro        | rs77260498   | 0,0058            | 0.02 | 3        | 3.4  | pat     |                   |                     |
| FLII   | 17  | 18,148,496        | NM_002018.3    | c.3766C>T             | p.Arg1256Cys       | -            | 0,0001            | 0.03 | 1        | 4    | pat     | unknown           | yes                 |
|        |     | 18,155,793        |                | c.1091A>T             | p.Glu364Val        | rs61741784   | 0,0049            | 0.01 | 2        | 5.8  | pat     |                   |                     |
| ZSWIM1 | 20  | 44,511,257        | NM_080603.4    | c.26G>A               | p.Trp9*            | rs35972756   | 0,0079            | na   | na       | 0.4  | pat     | unknown           | no                  |
|        |     | 44,512,082        |                | c.851G>A              | p.Arg284His        | rs45447691   | 0,0079            | 0.11 | 3        | -1.7 | pol     |                   |                     |

**SUPP. TABLE S2. Clinical features of affected persons from different branches of the family**

| Individual                           | Parental consanguinity | CNS                    | Renal                                  | Lung, HEENT                                                         | Eye | Age at death                                                            |
|--------------------------------------|------------------------|------------------------|----------------------------------------|---------------------------------------------------------------------|-----|-------------------------------------------------------------------------|
| V:12<br>(index patient)<br>born 2004 | yes                    | MTS<br>ataxia<br>MR    | PKD<br>enlarged kidneys<br>ROH<br>ESRD | mild lung hypoplasia<br>frequent pulmonary<br>infections and otitis | LCA | survived and clinically<br>improved after KTx<br>current age: 9.5 years |
| IV:1<br>born 1971                    | yes                    | no MRI<br>ataxia<br>MR | PKD<br>enlarged kidneys<br>ESRD        | ND                                                                  | LCA | 9 years                                                                 |
| IV:6<br>born 1993                    | yes                    | no MRI<br>ataxia<br>MR | PKD<br>enlarged kidneys<br>ROH<br>ESRD | lung hypoplasia                                                     | LCA | 6 ½ years                                                               |
| V:1<br>born 2010                     | yes                    | ND                     | PKD<br>enlarged kidneys<br>ROH<br>ESRD | severe lung hypoplasia                                              | ND  | 1 day                                                                   |
| V:2<br>born 2010                     | yes                    | ND                     | PKD<br>enlarged kidneys<br>ROH<br>ESRD | severe lung hypoplasia                                              | ND  | 2 days                                                                  |

MTS, molar tooth sign; MR, mental retardation/developmental delay; PKD, polycystic kidney disease; ROH, renal oligohydramnion; ESRD, endstage renal disease; LCA, Leber congenital amaurosis; KTx, kidney transplantation; ND, no data available.

**SUPP. TABLE S3. Homozygous variants in candidate genes from WES data of the index patient contained in mapped chromosomal HBD regions**

| Gene                | Chr | Position (GRCh37) | RefSeq         | Nucleotide alteration | Protein alteration | Variant name | Variant frequency | Sift | Polyphen | GERP | MutTast | Mendelian disease                             | ciliary/centrosomal | Mapped HBD regions (Mb) |
|---------------------|-----|-------------------|----------------|-----------------------|--------------------|--------------|-------------------|------|----------|------|---------|-----------------------------------------------|---------------------|-------------------------|
| <i>NRXN1</i>        | 2   | 50,573,999        | NM_138735.2    | c.89G>A               | p.Arg30His         | -            | -                 | na   | 2        | 4.1  | pat     | unknown                                       | no                  | 65,93                   |
| <i>C2ORF42</i>      | 2   | 70,406,718        | NM_017880.1    | c.880G>T              | p.Ala294Ser        | rs141350086  | 0,0015            | na   | 1        | 3    | pol     | unknown                                       | no                  |                         |
| <i>TET3</i>         | 2   | 74,274,537        | NM_144993.1    | c.1088_1093del        | p.Ala367_Pro368del | -            | -                 | na   | na       | na   | na      | unknown                                       | no                  |                         |
| <i>SUCLG1</i>       | 2   | 84,668,421        | NM_003849.3    | c.481C>T              | p.Arg161Cys        | rs141331864  | 0,0002            | 0.1  | 1        | 5.6  | pat     | MTDPS9 (ar)                                   | no                  |                         |
| <i>RETSAT</i>       | 2   | 85,571,285        | NM_017750.3    | c.1370G>A             | p.Arg457Gln        | rs41289947   | 0,0017            | 0.23 | 1        | na   | pat     | unknown                                       | no                  |                         |
| <i>ANKRD36</i>      | 2   | 97,875,561        | NM_001164315.1 | c.3319G>C             | p.Val1107Leu       | -            | 0,0009            | na   | na       | 0.2  | pol     | unknown                                       | no                  |                         |
| <i>SLC40A1</i>      | 2   | 190,428,384       | NM_014585.5    | c.1328C>T             | p.Pro443Leu        | rs45606432   | 0,0016            | 0.78 | 2        | 2.9  | pol     | HFE4 (ad)                                     | no                  | 56,62                   |
| <i>BOLL</i>         | 2   | 198,631,285       | NM_197970.2    | c.559A>G              | p.Ile187Val        | rs61642236   | 0,0003            | na   | na       | 2.6  | pol     | unknown                                       | no                  |                         |
| <i>RNF25</i>        | 2   | 219,530,673       | NM_022453.2    | c.539A>G              | p.Gln180Arg        | rs149561416  | 0,0018            | 0.52 | 1        | -1.1 | pol     | unknown                                       | no                  |                         |
| <i>ABCB6</i>        | 2   | 220,079,686       | NM_005689.2    | c.1273C>G             | p.Leu425Val        | rs111852229  | 0,0009            | 0.26 | 1        | 5    | na      | colob/microphth (ad); Lan(-) blood-group (ar) | yes                 |                         |
| <i>GLB1L</i>        | 2   | 220,103,915       | NM_024506.3    | c.961C>T              | p.Arg321Cys        | rs148493267  | 0,001             | 0.04 | 3        | 1.6  | pol     | unknown                                       | no                  |                         |
| <i>NCL</i>          | 2   | 232,325,391       | NM_005381.2    | c.798_800del          | p.Glu271del        | -            | -                 | na   | na       | na   | na      | unknown                                       | no                  |                         |
| <i>ALPI</i>         | 2   | 233,323,405       | NM_001631.3    | c.1247C>T             | p.Pro416Leu        | -            | 0,0001            | na   | 3        | 3.8  | pat     | unknown                                       | no                  |                         |
| <i>PPFIA2</i>       | 12  | 81,661,833        | NM_001220476.1 | c.3326G>A             | p.Arg1109His       | rs61756413   | 0,0064            | na   | na       | 5.9  | pat     | unknown                                       | no                  | 30,24                   |
| <b><i>POC1B</i></b> | 12  | 89,885,848        | NM_172240.2    | c.317G>C              | p.Arg106Pro        | -            | -                 | 0.15 | 3        | 5.8  | pat     | LCA, JBTS with PKD, this study                | yes                 |                         |
| <i>PAH</i>          | 12  | 103,234,285       | NM_000277.1    | c.1208C>T             | p.Ala403Val        | rs5030857    | 0,0005            | na   | 1        | 5.6  | pat     | PKU                                           | no                  |                         |
| <i>CCL15</i>        | 17  | 34,324,806        | NM_032965.4    | c.339A>G              | p.Ile113Met        | rs147708747  | 0,0001            | 0.01 | na       | 0.8  | pol     | unknown                                       | no                  | 7,27                    |
| <i>KRT34</i>        | 17  | 39,535,305        | NM_021013.3    | c.1126C>T             | p.Arg376Trp        | rs61740668   | 0,0053            | na   | 3        | 4    | pat     | unknown                                       | no                  |                         |
| <i>GALK1</i>        | 17  | 73,758,896        | NM_000154.1    | c.682C>T              | p.Arg228Cys        | -            | -                 | na   | 3        | 5.3  | pat     | cataract (ar)                                 | no                  | 16,87                   |

The extent of these regions is given in megabases, Mb. Chromosomal coordinates are given in GRCh37. Variant names and population allele frequencies are taken from dbSNP, the 1000 Genomes Project and the Exome Sequencing Project. Predictions of pathogenicity and evolutionary conservation (only available for SNPs) have been performed with SIFT (close to zero is most damaging), POLYPHEN2 (1=benign; 2=possibly damaging; 3=probably damaging), GERP++ (rejected substitution score; high numbers for high evolutionary conservation) and MutationTaster (pat=pathogenic, pol=polymorphism). The variants in *ABCB6* and *POC1B* (in bold) represented prime candidate variants because they were predicted as pathogenic by most programs and have documented ciliary/centrosomal expression. Assessment of deletions or insertions is out of scope for the methods of the prediction programs which require knowledge of the ancestral amino acids at that position (except MutationTaster). Due to ID-mapping problems between different databases, predictions were not available for some transcripts: na=not available. ar, autosomal recessive. MTDPS9, mitochondrial DNA depletion syndrome 9; HFE4, hemochromatosis type 4; PKU, phenylketonuria; Polyphen: 1=benign, 2=possibly damaging, 3=probably damaging. na, not applicable.
